# Supplementary material for: Novel drug-target interactions via link prediction and network embedding
Source: PubMed Central journal article supplement (PMC8978405; doi:10.1186/s12859-022-04650-w), 2022-04-04

**(a-1)**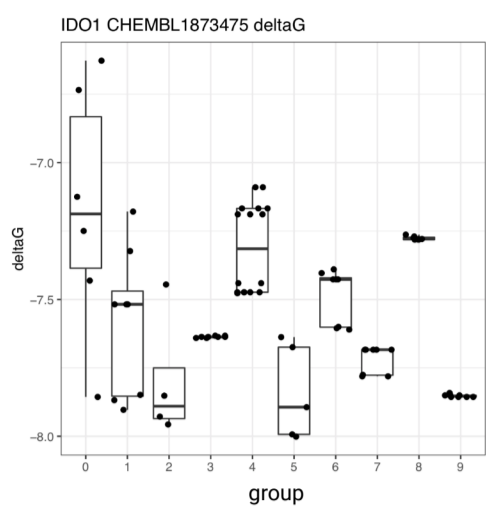**(a-2)**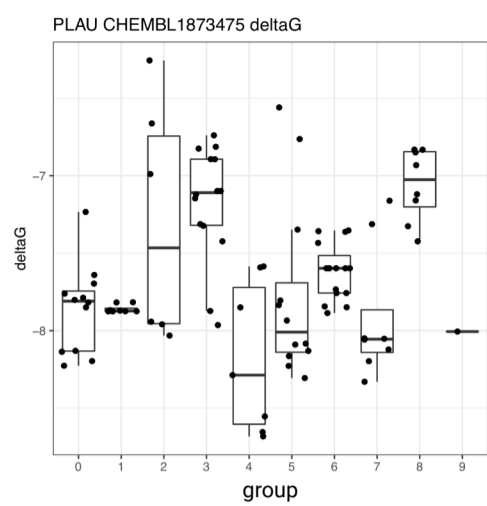**(a-3)**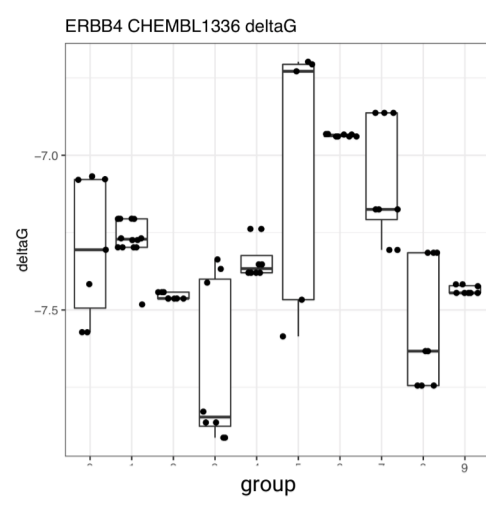**(a-4)**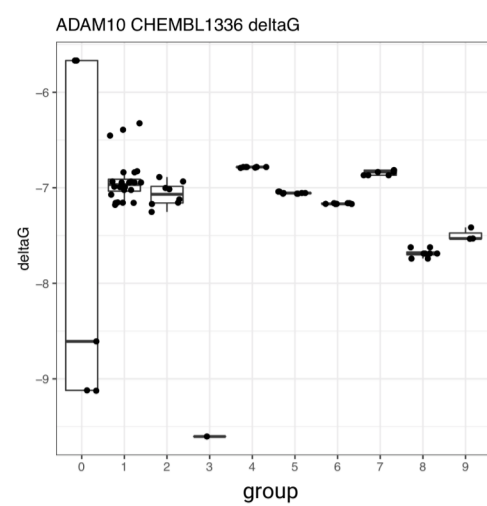**(a-5)**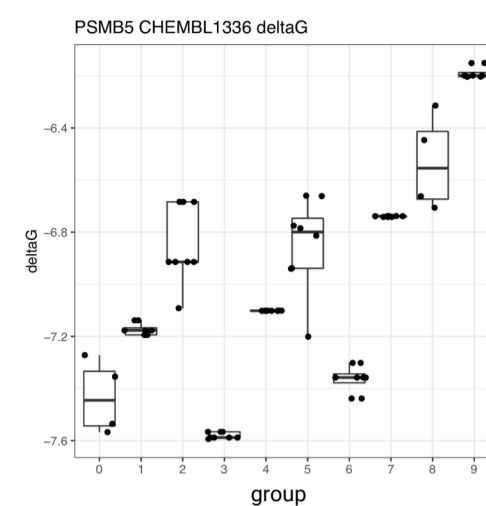**(b-1)**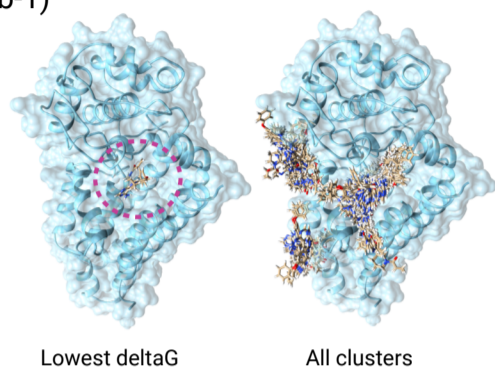**(b-2)**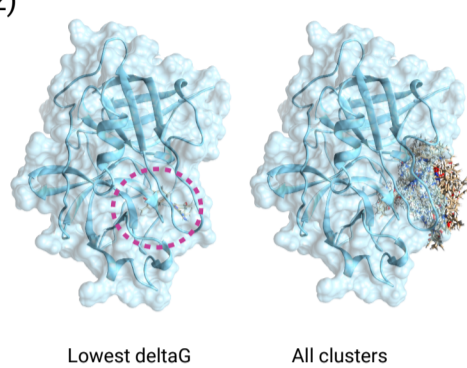**(b-3)**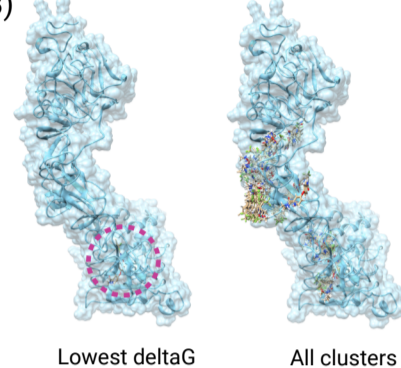**(b-4)**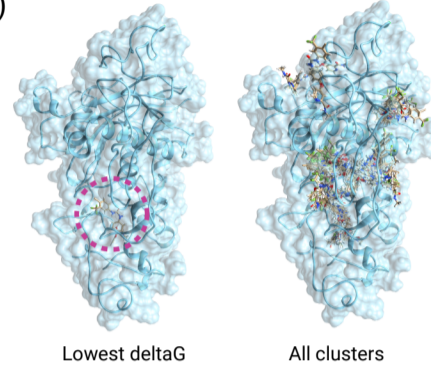**(b-5)**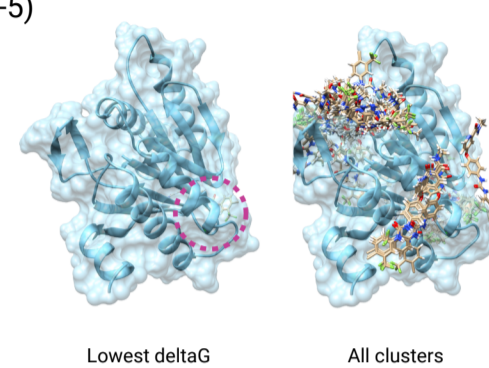**(a-6)**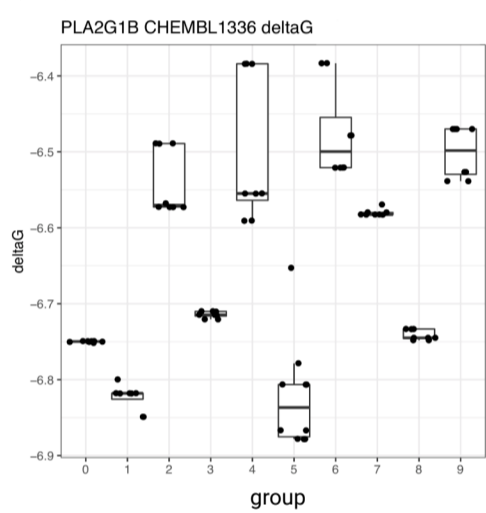**(a-7)**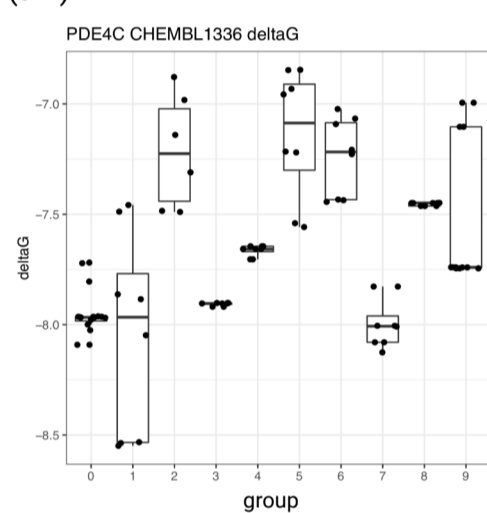**(a-8)**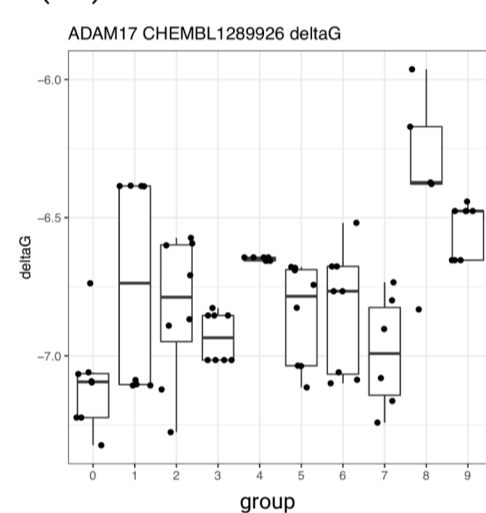**(a-9)**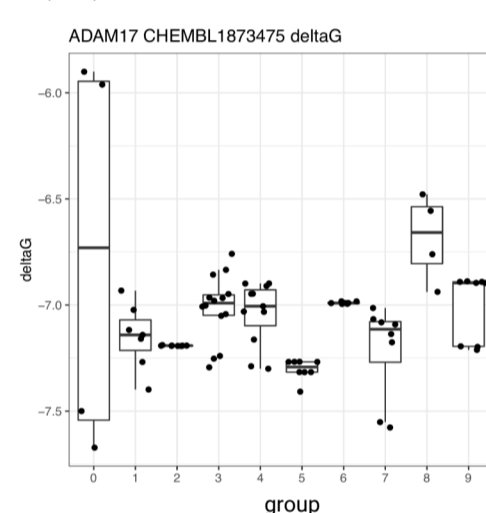**(a-10)**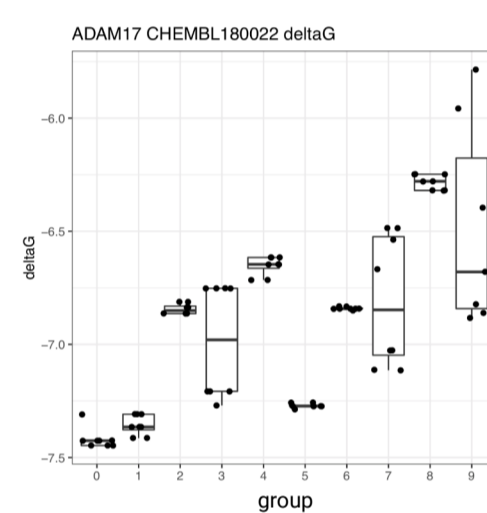**(b-6)**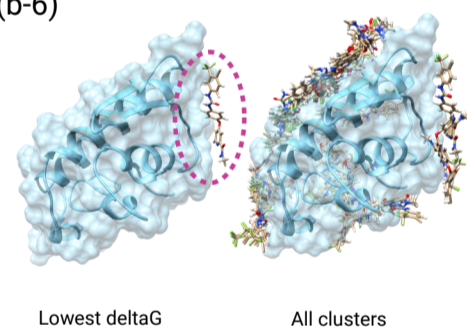**(b-7)**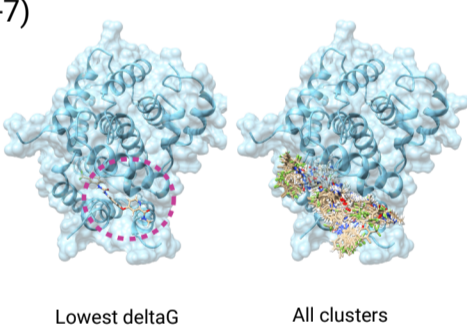**(b-8)**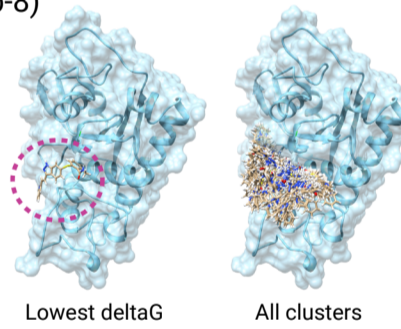**(b-9)**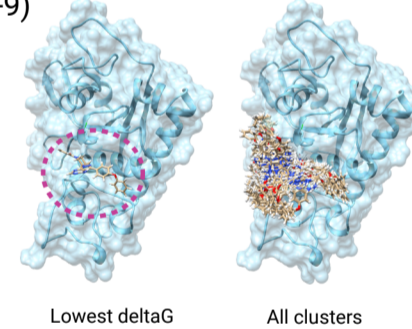**(b-10)**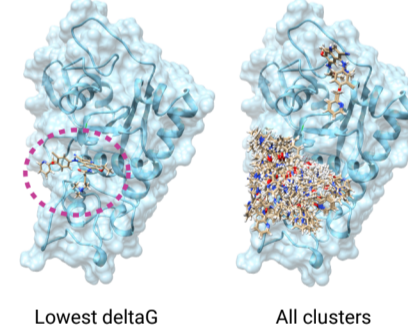**(a-11)**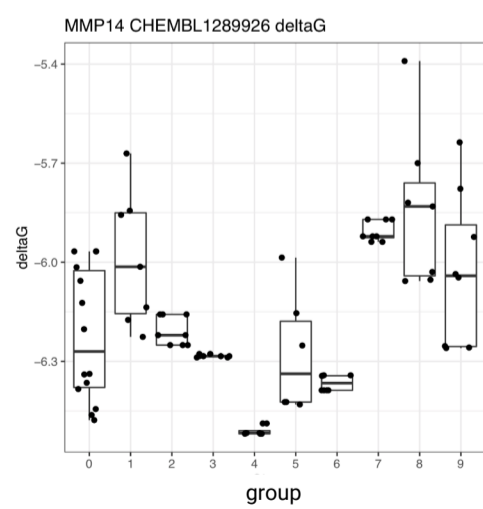**(a-12)**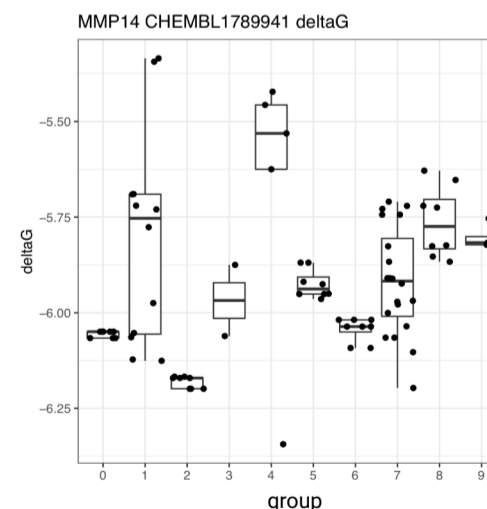**(a-13)**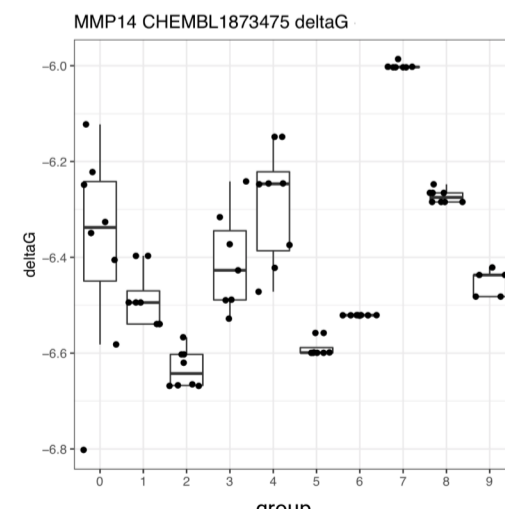**(b-11)**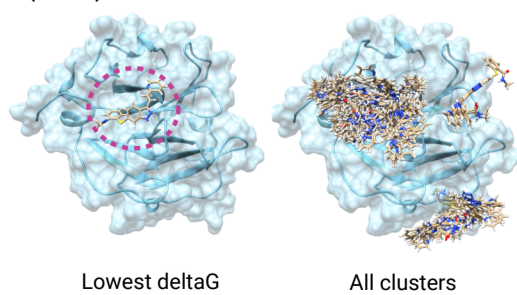**(b-12)**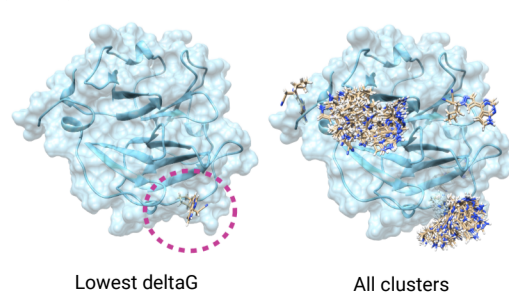**(b-13)**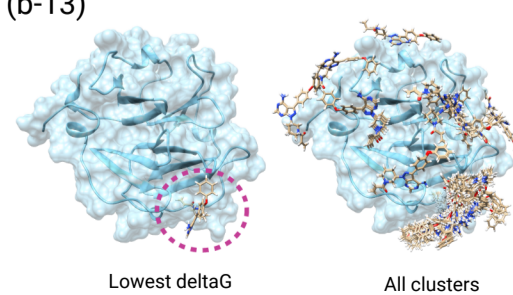

Supplement: 12859_2022_4650_MOESM8_ESM.pdf [file 12859_2022_4650_MOESM8_ESM.pdf]
