# Supplementary material for: Novel drug-target interactions via link prediction and network embedding
Source: PubMed Central journal article supplement (PMC8978405; doi:10.1186/s12859-022-04650-w), 2022-04-04

# Dataset

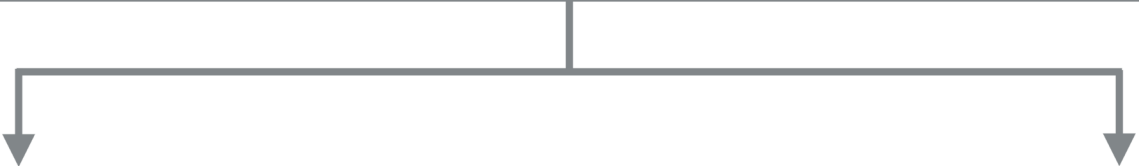

## Development-dataset

Known durg-target interactions (2057 negative, 1721 positive)

## Experimental-dataset

Unknown durg-target interactions (300378)

Internal train and test sets (80%, 10%)

External testset (10%)

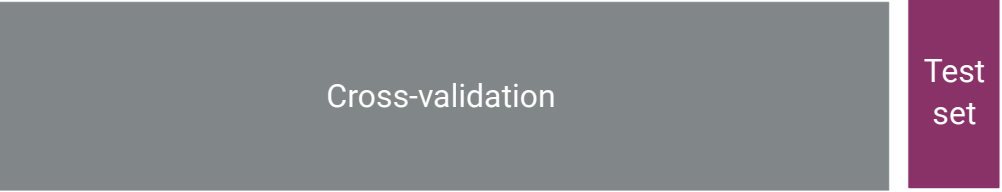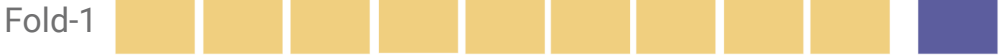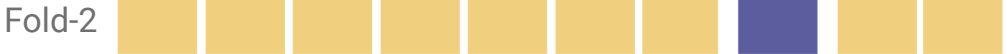

⋮

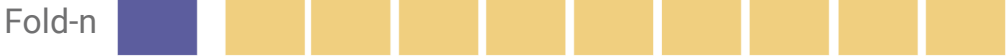

Supplement: 12859_2022_4650_MOESM4_ESM.pdf [file 12859_2022_4650_MOESM4_ESM.pdf]
