# Supplementary material for: Novel drug-target interactions via link prediction and network embedding
Source: PubMed Central journal article supplement (PMC8978405; doi:10.1186/s12859-022-04650-w), 2022-04-04

(a) Golden standard dataset

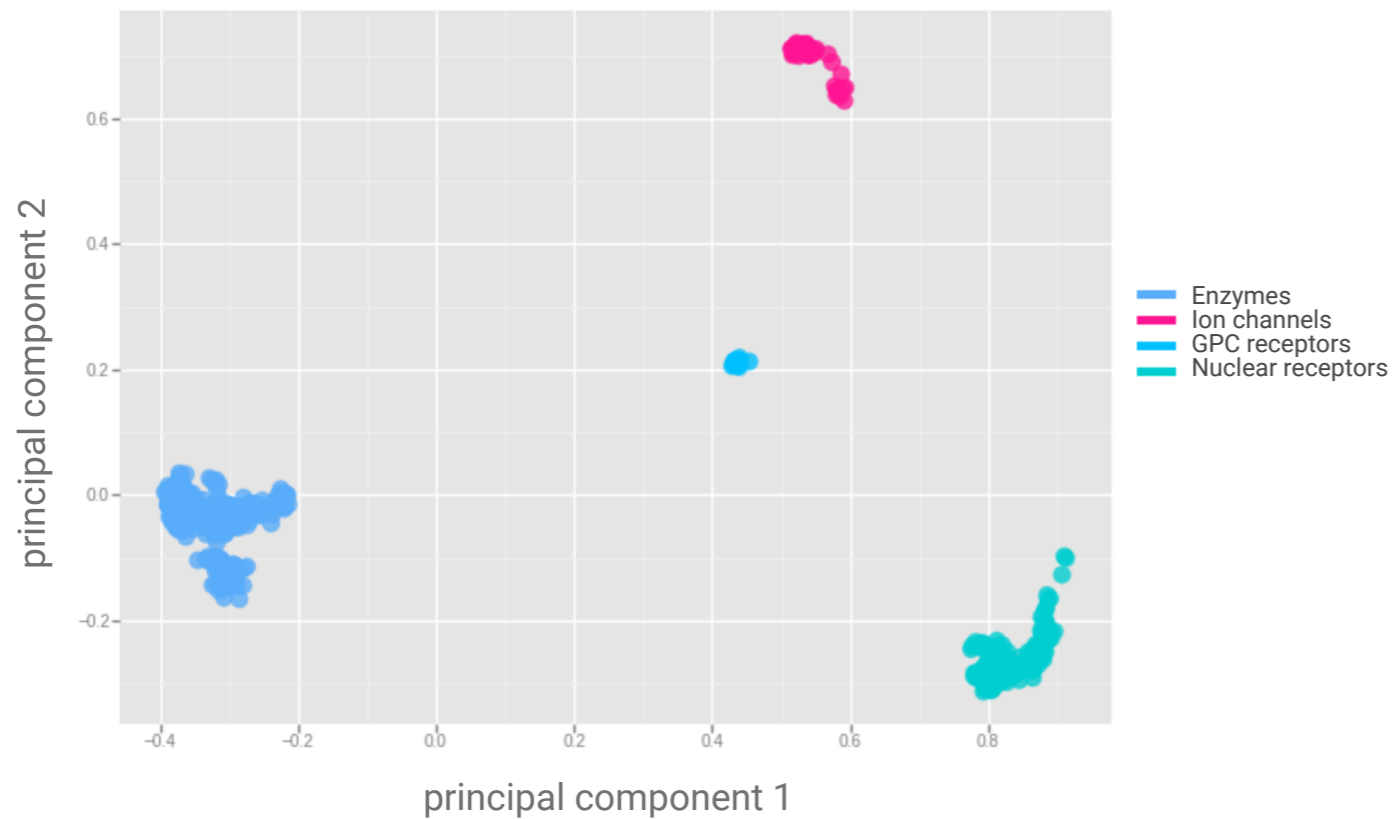

(b) ChEMBL dataset

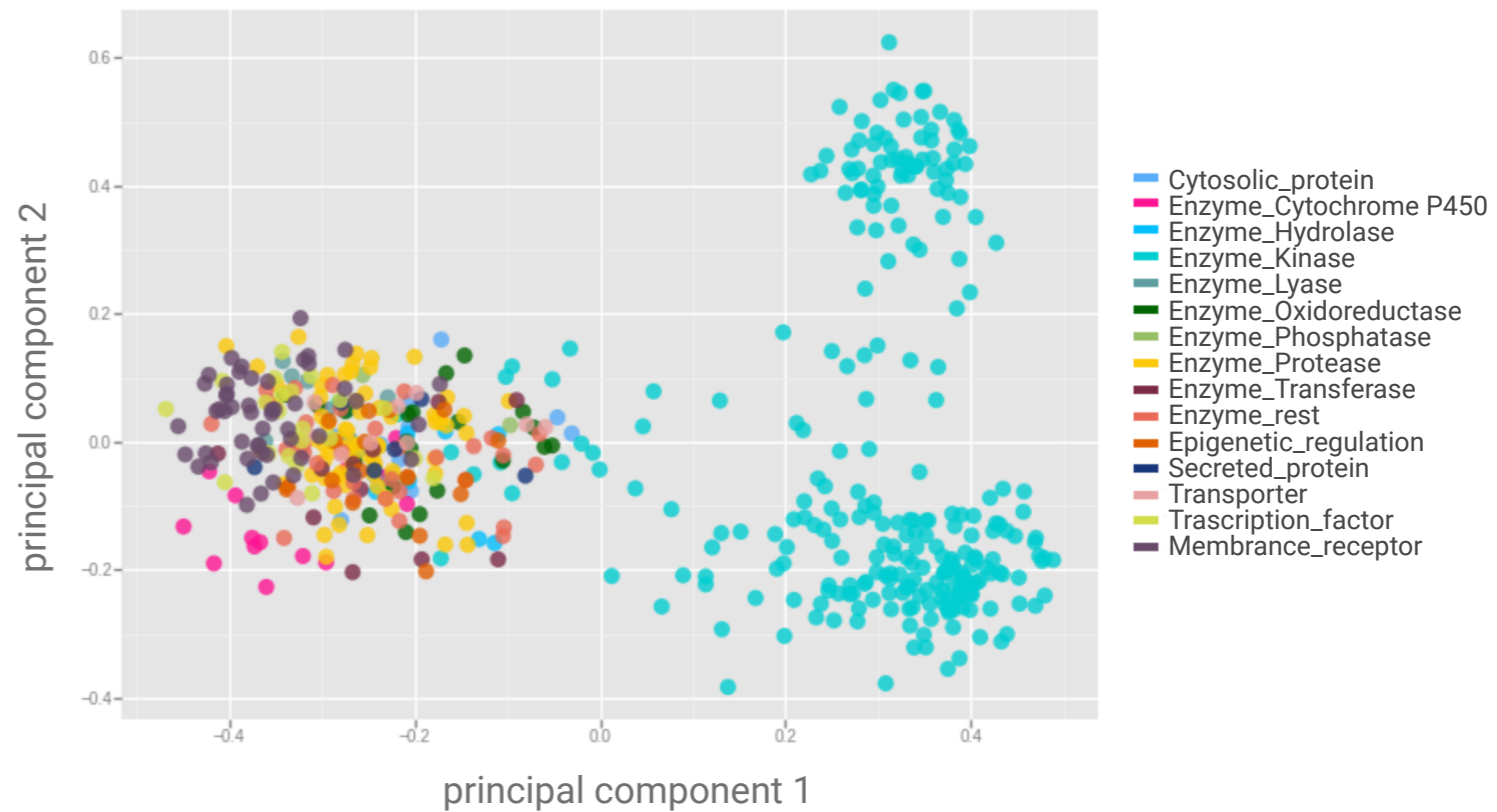

Supplement: 12859_2022_4650_MOESM6_ESM.pdf [file 12859_2022_4650_MOESM6_ESM.pdf]
